# Supplementary material for: Developing a Method to Precisely Locate the Keypoint During Craniotomy Using the Retrosigmoid Keyhole Approach: Surgical Anatomy and Technical Nuances
Source: Front Surg. 2021 Oct 8;8:700777. doi: 10.3389/fsurg.2021.700777 (PMC8531805; doi:10.3389/fsurg.2021.700777)
Supplement: Supplementary file 1 [file Data_Sheet_1.xlsx]

## Sheet: Sheet1
NUMBER	SIDE	CD	BD	AD
1	R	17.44	29.35	11.58
2	R	20.55	30.46	17.65
3	R	17.23	31.57	16.04
4	R	20.45	35.22	13.64
5	R	25.65	38.69	13.12
6	R	21.74	29.16	10.53
7	R	23.29	35.63	18.81
8	R	24.67	31.08	12.07
9	R	21.87	31.44	15.65
10	R	26.63	30.42	15.02
11	R	27.05	34.13	10.51
12	R	31.86	28.52	13.37
13	R	19.41	35.75	18.68
14	R	18.01	31.98	16.89
15	R	23.31	38.43	18.84
16	R	15.22	37.62	14.62
17	R	19.05	36.31	13.81
18	R	19.12	35.74	19.12
19	R	12.42	32.33	14.57
20	R	12.74	37.56	22.86
1	L	16.81	29.85	17.38
2	L	17.92	26.73	13.36
3	L	12.61	36.03	16.61
4	L	18.75	35.41	15.66
5	L	27.17	37.92	17.44
6	L	22.67	29.79	12.86
7	L	19.14	39.33	27.75
8	L	14.95	38.14	19.76
9	L	12.32	32.31	15.94
10	L	18.66	39.31	15.04
11	L	21.24	34.33	15.66
12	L	21.62	31.82	15.34
13	L	20.88	30.17	15.15
14	L	20.37	32.97	15.85
15	L	20.43	35.74	18.25
16	L	18.66	32.36	15.56
17	L	18.36	36.56	13.17
18	L	19.14	41.09	23.96
19	L	14.39	36.22	19.16
20	L	13.62	33.59	15.75
